# Supplementary material
Source: Springer Nature journal article supplement (https://www.springermedizin.de/resource/supplementary/40478_2014_108_MOESM5_ESM.pdf/25658178)
Supplement: MOESM5 [file 25658178]

**a****Spine density (basal)**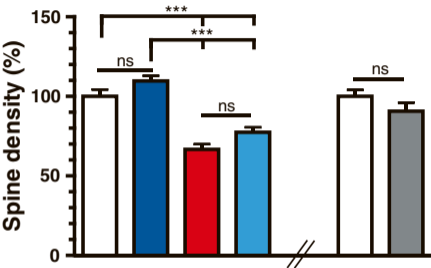

- WT (6421 spines, n = 20 cells)
- APLP2-KO (8090 spines, n = 30 cells)
- APP-KO (3755 spines, n = 15 cells)
- APP/APLP2-DKO (3210 spines, n = 15 cells)
- APLP1-KO (4229 spines, n = 15 cells)

**b****Spine density (apical)**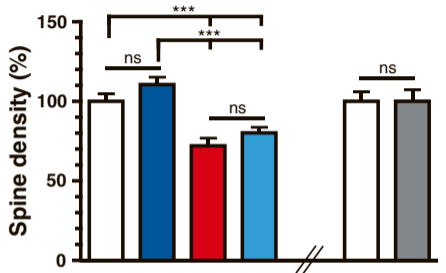

- WT (6321 spines, n = 20 cells)
- APLP2-KO (7187 spines, n = 30 cells)
- APP-KO (3474 spines, n = 15 cells)
- APP/APLP2-DKO (2762 spines, n = 15 cells)
- APLP1-KO (4459 spines, n = 15 cells)
